# Supplementary material for: Soft experimental constraints for soft interactions: a spectroscopic benchmark data set for weak and strong hydrogen bonds
Source: Royal Society of Chemistry journal article supplement (doi:10.1039/c9cp03651b), 2019-01-01
Supplement: c9cp03651b1.pdf [file c9cp03651b1.pdf]

**Supporting Information: Soft  
experimental constraints for soft  
interactions: A spectroscopic  
benchmark data set for weak and  
strong hydrogen bonds**

Sönke Oswald and Martin A. Suhm

**Table S1:** Gaussian keywords employed in the different calculations. For all complexes containing OO, charge and spin multiplicity were specified as 0 3 instead of the typically used 0 1, invoking UHF treatment of the open-shell system.

| Level of approximation | Employed keywords                                                   |
|------------------------|---------------------------------------------------------------------|
| all                    | int=superfine, Def2QZVP, fopt=verytight, freq=raman, output=pickett |
| ...-D3(BJ)/...         | empiricaldispersion=gd3bj                                           |
| B3LYP-...              | b3lyp                                                               |
| PBE0-...               | PBE1PBE                                                             |
| M06-2X/...             | M062X                                                               |
