# Supplementary material for: Soft experimental constraints for soft interactions: a spectroscopic benchmark data set for weak and strong hydrogen bonds
Source: Royal Society of Chemistry journal article supplement (doi:10.1039/c9cp03651b), 2019-01-01
Supplement: c9cp03651b2.zip [file c9cp03651b2.zip]

## Sheet: Sheet1
																								Experimental values and respective error bar calculations
										d2(x)
										basis set for all: def2-QZVP							Normalised to average d2(x)												Global modifier for off-diagonal anharmonicity: 20 % of diagonal anharmonicity	0.2
		#	Benchmarking observable	Experimental value (harmonic back-correction)	Error	Unit	B3LYP-D3	PBE0-D3	M06-2X	B3LYP-D3	PBE0-D3	M06-2X	Benchmarking observable	Average d2(x) for all three methods	Standard deviation s of d2(x)	Ratio of standard deviation and average of d2(x)	B3LYP-D3	PBE0-D3	M06-2X	Benchmarking observable				NN monomer harmonic NN stretching band centre					Alternative approach via fitting of several vibrational states measured with CARS
		1	Equilibrium rotational constant of the NN monomer	59905.8	1.03963	MHz	60750.5	60896.8	61284.1	660279	908654	1.75777e+06	R1D: NN	1.1089e+06	813877	0.733948	0.595435	0.819418	1.58515	R1D: NN					n0 / cm-1	First hot band / cm-1	x1,1 / cm-1	we / cm-1	we / cm-1
		2	Equilibrium rotational constant of the OO monomer	43338.6	2.69813	MHz	43609.7	44461.2	44782.2	10097	173111	286257	R1D: OO	156488	196333	1.25462	0.0645223	1.10622	1.82925	R1D: OO				Value	2329.91	2301.25	-14.3303	2358.57	2358.54
		3	Equilibrium rotational constant of the HF monomer	628176	1.05996	MHz	621534	627205	626575	3.92722e+07	840209	2.28162e+06	R1D: HF	1.41313e+07	3.0808e+07	2.18012	2.77908	0.0594571	0.161458	R1D: HF				Error	6e-05	0.0005	0.00028	0.00062	0.00039
		4	Equilibrium rotational constant of the dHF monomer	330027	1.01619	MHz	326649	329629	329298	1.10481e+07	152867	513427	R1D: dHF	3.90479e+06	8.75242e+06	2.24146	2.82937	0.0391486	0.131486	R1D: dHF				References	Bendtsen and Rasmussen; 2000; https://doi.org/10.1002/1097-4555(200005)31:5<433::AID-JRS554>3.0.CO;2-T	Martinez and Bermejo; 2013; DOI 10.1002/jrs.4245			Orlov et al.; 1997; DOI:10.1006/jmsp.1997.7365
Molecule abbreviations		5	NN monomer harmonic NN stretching band centre	2358.57	1.00062	cm-1	2448.5	2480.37	2525.22	8076.1	14817.1	27735.7	V1D: NN	16876.3	14128.4	0.837173	0.478547	0.877982	1.64347	V1D: NN				OO monomer harmonic OO stretching band centre					Alternative approach via fitting of several vibrational states
Nitrogen - NN		6	OO monomer harmonic OO stretching band centre	1579.91	1.0005	cm-1	1634.88	1712.68	1763.48	3018.72	17610.6	33664.2	V1D: OO	18097.8	21677.8	1.19782	0.1668	0.973076	1.86012	V1D: OO					n0 / cm-1	First hot band / cm-1	x1,1 / cm-1	we / cm-1	we / cm-1
Oxygen - OO		7	HF monomer harmonic HF stretching band centre	4133.47	1.002	cm-1	4084.67	4155.04	4173.98	2372.61	463.053	1633.88	V1D: HF	1489.85	1361.74	0.914011	1.59252	0.310805	1.09667	V1D: HF				Value	1556.39	1532.87	-11.7613	1579.91	1580.16
Hydrogen fluoride - HF		8	dHF monomer harmonic DF stretching band centre	3000.35	1.08	cm-1	2961.18	3012.19	3025.92	1315.4	120.264	560.751	V1D: dHF	665.471	854.765	1.28445	1.97664	0.18072	0.842638	V1D: dHF				Error	0.00012	0.00026	0.00019	0.0005	0.009
Formic acid - FA		9	Equilibrium rotational A constant of the FA monomer	77568	768	MHz	78201.6	78513.6	78197.3	0.680581	1.51591	0.67145	R1P: FA	0.955981	0.685804	0.717382	0.711918	1.58571	0.702368	R1P: FA				References	Rouillé et al; 1992; DOI:10.1016/0022-2852(92)90215-A	Rouillé et al; 1992; DOI:10.1016/0022-2852(92)90215-A			Irikura; 2007; DOI:10.1063/1.2436891; Shimauchi et al.; 1995; DOI:10.1143/JJAP.34.L1689
Acetic acid - AA		10	Equilibrium rotational B constant of the FA monomer	12175.7	120.551	MHz	12084.7	12206.5	12232.1	0.569081	0.0653072	0.219118	R1P: FA	0.284502	0.365112	1.28334	2.00027	0.229549	0.77018	R1P: FA				HF monomer harmonic HF stretching band centre
Trifluoroethanol - TE		11	Equilibrium rotational C constant of the FA monomer	10520.2	104.16	MHz	10467.2	10564.1	10577.5	0.258651	0.177706	0.302927	R1P: FA	0.246428	0.0898011	0.364411	1.0496	0.721128	1.22927	R1P: FA					n0 / cm-1	First overtone / cm-1	x1,1 / cm-1	we / cm-1
Hexafluoroisopropanol - HP		12	Equilibrium rotational A constant of the AA monomer	11448.8	113.355	MHz	11379	11480.8	11489.5	0.379191	0.0794938	0.129026	R1P: AA	0.195903	0.227196	1.15973	1.9356	0.405781	0.658619	R1P: AA				Value	3961.42	7750.79	-86.0255	4133.47
		13	Equilibrium rotational B constant of the AA monomer	9573.39	94.786	MHz	9491.08	9565.01	9540.44	0.754109	0.00781742	0.120834	R1P: AA	0.294253	0.568847	1.93319	2.56279	0.026567	0.410645	R1P: AA				Error	0.00025	0.0015	0.000875	0.002
Additional information in molecule abbreviations		14	Equilibrium rotational C constant of the AA monomer	5378.15	53.249	MHz	5344.66	5390.76	5384.68	0.395645	0.0561251	0.0150594	R1P: AA	0.15561	0.295413	1.89842	2.54255	0.360678	0.0967768	R1P: AA				References	Guelachvili; 1976; DOI:10.1016/0030-4018(76)90408-9	Guelachvili; 1976; DOI:10.1016/0030-4018(76)90408-9
d - deuterated		15	Equilibrium rotational A constant of the gTE monomer	5373.1	53.199	MHz	5280.36	5343.25	5357.22	3.03919	0.314908	0.0890884	R1P: gTE	1.14773	2.32206	2.02317	2.648	0.274375	0.0776214	R1P: gTE				dHF monomer harmonic HF stretching band centre					Alternative approach via fitting of several vibrational states
t - trans conformation		16	Equilibrium rotational B constant of the gTE monomer	2856.78	28.285	MHz	2806.27	2840.16	2854.87	3.18968	0.345536	0.00458828	R1P: gTE	1.17994	2.47321	2.09605	2.70327	0.292843	0.00388858	R1P: gTE					n0 / cm-1	First overtone / cm-1	x1,1 / cm-1	we / cm-1	we / cm-1
g - gauche conformation		17	Equilibrium rotational C constant of the gTE monomer	2824.26	27.963	MHz	2774.08	2806.85	2823.02	3.22106	0.387628	0.00196557	R1P: gTE	1.20355	2.48593	2.0655	2.6763	0.32207	0.00163315	R1P: gTE				Value	2906.84	5722.27	-45.705	2998.25	3000.35
hydrogen bonded clusters are abbreviated in donor-acceptor sequence		18	Equilibrium rotational A constant of the tHP monomer	2126.17	21.0512	MHz	2089.82	2115.66	2122.17	2.98133	0.249458	0.0361835	R1P: tHP	1.08899	2.32253	2.13274	2.7377	0.229073	0.0332267	R1P: tHP				Error	0.09	0.09	0.09	0.27	0.08
		19	Equilibrium rotational B constant of the tHP monomer	1064.53	10.54	MHz	1042.18	1053.08	1062.53	4.49974	1.18045	0.0363503	R1P: tHP	1.90551	3.27865	1.72061	2.36143	0.61949	0.0190764	R1P: tHP				References	Talley et al.; 1950; DOI:10.1103/PhysRev.77.529	Talley et al.; 1950; DOI:10.1103/PhysRev.77.529			Talley et al.; 1950; DOI:10.1103/PhysRev.77.529
V1D: Vibrational monomer band centre positions diatomics		20	Equilibrium rotational C constant of the tHP monomer	941.663	9.3234	MHz	922.907	932.693	939.878	4.04706	0.925657	0.036655	R1P: tHP	1.66979	2.97864	1.78384	2.42369	0.554355	0.0219518	R1P: tHP				FA monomer harmonic OH stretching band centre
R1D: Rotational constants diatomics		21	FA monomer harmonic OH stretching band centre	3742	25.2	cm-1	3727.18	3781.27	3800.76	0.345912	2.4282	5.43698	V1P: FA	2.73703	3.61975	1.32251	0.126382	0.887167	1.98645	V1P: FA					n0 / cm-1	First overtone / cm-1	x1,1 / cm-1	we / cm-1
V1P: Vibrational monomer band centre positions polyatomics		22	dFA monomer harmonic OD stretching band centre	2712	32.1	cm-1	2709.92	2749.13	2763.83	0.00418702	1.33796	2.60747	V1P: dFA	1.31654	1.84099	1.39835	0.00318032	1.01627	1.98055	V1P: dFA				Value	3570	6968	-86	3742
R1P: Rotational constants polyatomic monomers		23	AA monomer harmonic OH stretching band centre	3764	31.9	cm-1	3750.11	3803.33	3818.94	0.189501	1.51982	2.96658	V1P: AA	1.55863	1.96427	1.26025	0.121581	0.975097	1.90332	V1P: AA				Error	2	2	3	25.2
R2: Rotational constants polyatomic complexes		24	dAA monomer harmonic OD stretching band centre	2737	33.3	cm-1	2727.76	2766.31	2778.16	0.0769854	0.774902	1.5277	V1P: dAA	0.793195	1.02605	1.29357	0.0970574	0.976938	1.926	V1P: dAA				References	Oswald et al.; 2018; DOI:10.1021/acs.jpca.8b00334	Freytes et al; 2002; DOI:10.1016/S0301-0104(02)00507-4
S1: H-bond induced spectral downshifts		25	gTE monomer harmonic OH stretching band centre	3827.1	33.04	cm-1	3817.79	3872.43	3877.5	0.0794049	1.88227	2.32649	V1P: gTE	1.42939	1.68296	1.1774	0.0555516	1.31683	1.62761	V1P: gTE				dFA monomer harmonic OD stretching band centre
S2: Isomer wavenumber splittings		26	tHP monomer harmonic OH stretching band centre	3790	24.7	cm-1	3788.89	3840.06	3838.88	0.00200827	4.10751	3.91609	V1P: tHP	2.6752	3.27678	1.22487	0.000750699	1.5354	1.46385	V1P: tHP					n0 / cm-1	First overtone / cm-1	x1,1 / cm-1	we / cm-1
E1: Dissociation energies		27	gHP monomer harmonic OH stretching band centre	3836	24.9	cm-1	3826.64	3878.43	3881.35	0.141442	2.90363	3.31657	V1P: gHP	2.12055	2.44142	1.15132	0.0667009	1.36928	1.56402	V1P: gHP				Value	2631	5181	-40.5	2712
E2: Energy differences between isomers		28	Equilibrium rotational B constant of the HFNN dimer	3227.31	95.8606	MHz	3400.1	3418.86	3357.57	3.24936	3.99306	1.84653	R2: HFNN	3.02965	1.54149	0.508802	1.07252	1.31799	0.609487	R2: HFNN				Error	2	10	11	32.1
		29	Equilibrium rotational A constant of the tHPNN dimer	977.781	29.043	MHz	958.225	969.392	972.858	0.453423	0.0834415	0.0287367	R2: tHPNN	0.188534	0.326719	1.73295	2.405	0.442582	0.152422	R2: tHPNN				References	Oswald et al.; 2018; DOI:10.1021/acs.jpca.8b00334	Morita and Nagakura; 1972; DOI:10.1016/0022-2852(72)90122-1
		30	Equilibrium rotational B constant of the tHPNN dimer	741.664	22.0296	MHz	742.954	740.572	758.474	0.00342956	0.00245997	0.582278	R2: tHPNN	0.196056	0.473024	2.4127	0.0174928	0.0125473	2.96996	R2: tHPNN				AA monomer harmonic OH stretching band centre
		31	Equilibrium rotational C constant of the tHPNN dimer	538.6	15.998	MHz	535.659	535.366	548.123	0.0338019	0.0408706	0.354342	R2: tHPNN	0.143005	0.258882	1.8103	0.236369	0.285799	2.47783	R2: tHPNN					n0 / cm-1	First overtone / cm-1	x1,1 / cm-1	we / cm-1
		32	Equilibrium rotational B constant of the HFHF dimer	6559.95	194.85	MHz	6890.43	6957.17	6922.18	2.87661	4.15585	3.45592	R2: HFHF	3.49613	0.905902	0.259116	0.822799	1.1887	0.988499	R2: HFHF				Value	3585	6991	-89.5	3764
		33	Equilibrium rotational B constant of the dHFHF dimer	6565.37	195.011	MHz	6869.94	6936.52	6901.01	2.43938	3.62231	2.96232	R2: dHFHF	3.008	0.838328	0.278699	0.810963	1.20422	0.984812	R2: dHFHF				Error	4	3	5	31.9
		34	Equilibrium rotational B constant of the HFdHF dimer	6308.84	187.391	MHz	6642.75	6708.77	6672.76	3.17512	4.55492	3.77163	R2: HFdHF	3.83389	0.978637	0.25526	0.828172	1.18807	0.983761	R2: HFdHF				References	Oswald et al.; 2018; DOI:10.1021/acs.jpca.8b00334	Lange et al.; 2001; DOI: 10.1021/jp003277u
		35	Equilibrium rotational A constant of the FAFA dimer (with Coriolis coupling)	6101.07	181.22	MHz	6071.93	6123.96	6158.95	0.0258705	0.0159447	0.101981	R2: FAFA	0.0479321	0.0665672	1.38878	0.539733	0.332651	2.12762	R2: FAFA				dAA monomer harmonic OD stretching band centre
		36	Equilibrium rotational B constant of the FAFA dimer (with Coriolis coupling)	2335.19	69.362	MHz	2323.27	2377.93	2330.38	0.0295162	0.379778	0.00479723	R2: FAFA	0.13803	0.296594	2.14876	0.213838	2.75141	0.0347549	R2: FAFA					n0 / cm-1	First overtone / cm-1	x1,1 / cm-1	we / cm-1
		37	Equilibrium rotational C constant of the FAFA dimer (with Coriolis coupling)	1677.93	49.8395	MHz	1680.33	1712.84	1690.68	0.00232778	0.4906	0.0654163	R2: FAFA	0.186115	0.375576	2.01798	0.0125072	2.63601	0.351483	R2: FAFA				Value	2644	5195	-46.5	2737
		38	Equilibrium rotational A constant of the FAFA dimer (without Coriolis coupling)	6127.76	182.013	MHz	6071.93	6123.96	6158.95	0.0940923	0.000435957	0.0293616	R2: FAFA	0.0412966	0.0678191	1.64224	2.27845	0.0105567	0.710992	R2: FAFA				Error	2	10	11	33.3
		39	Equilibrium rotational B constant of the FAFA dimer (without Coriolis coupling)	2311.78	68.6667	MHz	2323.27	2377.93	2330.38	0.0280098	0.928149	0.0734086	R2: FAFA	0.343189	0.717145	2.08965	0.0816162	2.70448	0.213901	R2: FAFA				References	Oswald et al.; 2018; DOI:10.1021/acs.jpca.8b00334	Morita and Nagakura; 1972; DOI:10.1016/0022-2852(72)90122-1
		40	Equilibrium rotational C constant of the FAFA dimer (without Coriolis coupling)	1679.13	49.8751	MHz	1680.33	1712.84	1690.68	0.000584998	0.456845	0.0536189	R2: FAFA	0.17035	0.352882	2.07152	0.00343411	2.68181	0.314758	R2: FAFA				gTE monomer harmonic OH stretching band centre
		41	Equilibrium rotational A constant of the gTEgTE dimer	1639.87	48.7091	MHz	1610.33	1638.06	1620.12	0.367822	0.00139139	0.164425	R2: gTEgTE	0.17788	0.259629	1.45958	2.06782	0.00782206	0.924361	R2: gTEgTE					n0 / cm-1	First overtone / cm-1	x1,1 / cm-1	we / cm-1
		42	Equilibrium rotational B constant of the gTEgTE dimer	419.727	12.4671	MHz	420.259	414.054	445.818	0.00182469	0.207032	4.37967	R2: gTEgTE	1.52951	3.49373	2.28422	0.00119299	0.135359	2.86345	R2: gTEgTE				Value	3656.7	7143	-85.2	3827.1
		43	Equilibrium rotational C constant of the gTEgTE dimer	401.854	11.9363	MHz	402.239	396.536	427.202	0.00103981	0.198529	4.50987	R2: gTEgTE	1.56981	3.60353	2.29551	0.000662375	0.126466	2.87287	R2: gTEgTE				Error	1	7	7.5	33.04
		44	Equilibrium rotational A constant of the tHPtHP dimer	489.546	14.541	MHz	479.731	485.533	488.392	0.455636	0.076159	0.00630083	R2: tHPtHP	0.179365	0.341948	1.90643	2.54027	0.424603	0.0351285	R2: tHPtHP				References	Scharge et al.; 2007; DOI: 10.1039/b705498j	Scharge et al.; 2007; DOI: 10.1039/b705498j
		45	Equilibrium rotational B constant of the tHPtHP dimer	208.728	6.19984	MHz	206.123	204.546	211.838	0.176519	0.454946	0.251607	R2: tHPtHP	0.294357	0.20372	0.692085	0.599676	1.54556	0.854769	R2: tHPtHP				tHP monomer harmonic OH stretching band centre
		46	Equilibrium rotational C constant of the tHPtHP dimer	172.302	5.11787	MHz	169.81	168.871	174.45	0.237008	0.449444	0.176183	R2: tHPtHP	0.287545	0.202896	0.705616	0.824247	1.56304	0.612713	R2: tHPtHP					n0 / cm-1	First overtone / cm-1	x1,1 / cm-1	we / cm-1
		47	Equilibrium rotational A constant of the gHPtHP dimer	587.553	17.4521	MHz	570.606	574.575	596.432	0.942979	0.553025	0.25884	R2: gHPtHP	0.584948	0.485336	0.829708	1.61207	0.945426	0.442502	R2: gHPtHP				Value	3623	7079	-83.5	3790
		48	Equilibrium rotational B constant of the gHPtHP dimer	155.812	4.62808	MHz	154.749	153.817	161.049	0.0527686	0.185756	1.28063	R2: gHPtHP	0.506384	0.952902	1.88178	0.104207	0.366828	2.52896	R2: gHPtHP				Error	2	2	3	24.7
		49	Equilibrium rotational C constant of the gHPtHP dimer	154.325	4.5839	MHz	153.261	152.329	157.429	0.0538608	0.189547	0.458761	R2: gHPtHP	0.234056	0.291451	1.24522	0.230119	0.809835	1.96005	R2: gHPtHP				References	Suhm and Kollipost; 2013; DOI:10.1039/C3CP51515J	Suhm and Kollipost; 2013; DOI:10.1039/C3CP51515J
		50	Equilibrium rotational A constant of the gHPgHPgHP trimer	139.332	4.13857	MHz	138.257	138.964	143.397	0.0675061	0.00790587	0.964747	R2: gHPgHPgHP	0.34672	0.758098	2.18649	0.194699	0.0228019	2.7825	R2: gHPgHPgHP				gHP monomer harmonic OH stretching band centre
		51	Equilibrium rotational B constant of the gHPgHPgHP trimer	130.116	3.86484	MHz	127.908	127.477	131.012	0.326426	0.466417	0.053726	R2: gHPgHPgHP	0.28219	0.296804	1.05179	1.15676	1.65285	0.19039	R2: gHPgHPgHP					n0 / cm-1	First overtone / cm-1	x1,1 / cm-1	we / cm-1
		52	Equilibrium rotational C constant of the gHPgHPgHP trimer	79.7972	2.37021	MHz	79.1387	79.1644	80.2583	0.0771815	0.071276	0.0378534	R2: gHPgHPgHP	0.0621036	0.0299924	0.482942	1.24279	1.14769	0.60952	R2: gHPgHPgHP				Value	3667	7165	-84.5	3836
		53	Harmonic HF stretching downshift from HF to HFNN	43.1795	21.5899	cm-1	92.4551	102.003	66.416	5.20907	7.42338	1.15835	S1: HFNN	4.59693	4.49304	0.977399	1.13316	1.61485	0.251982	S1: HFNN				Error	2	2	3	24.9
		54	Harmonic OH stretching downshift from FA to FANN dimer	17	12.5	cm-1	36.8577	45.7045	27.32	2.5237	5.27327	0.681615	S1: FANN	2.8262	3.26786	1.15627	0.892968	1.86585	0.241178	S1: FANN				References	Suhm and Kollipost; 2013; DOI:10.1039/C3CP51515J	Suhm and Kollipost; 2013; DOI:10.1039/C3CP51515J
		55	Harmonic OH stretching downshift from dFA to dFANN dimer	11	9.5	cm-1	26.5467	32.7998	20.0462	2.67812	5.26572	0.906745	S1: dFANN	2.95019	3.10022	1.05085	0.907776	1.78487	0.307351	S1: dFANN
		56	Harmonic OH stretching downshift from AA to AANN dimer	13	12.5	cm-1	31.0237	39.9909	26.5141	2.07906	4.66246	1.16884	S1: AANN	2.63679	2.56306	0.972039	0.788484	1.76823	0.443281	S1: AANN
		57	Harmonic OH stretching downshift from dAA to dAANN dimer	10	9	cm-1	22.4593	28.7634	19.2956	1.91647	4.34648	1.06677	S1: dAANN	2.44324	2.40718	0.985239	0.784397	1.77898	0.43662	S1: dAANN
		58	Harmonic OH stretching downshift from tHP to tHPNN dimer	18	13	cm-1	35.4394	41.7914	30.6454	1.7996	3.34929	0.94619	S1: tHPNN	2.0317	1.72286	0.847993	0.885764	1.64852	0.465715	S1: tHPNN				Monomer rotational constants	Global modifier upper bound	1.02	Global modifier lower bound	1
		59	Harmonic OH stretching downshift from FA to FAOO dimer	10	9	cm-1	24.0344	25.5264	15.8567	2.43166	2.97616	0.423468	S1: FAOO	1.94376	1.90136	0.978187	1.25101	1.53113	0.21786	S1: FAOO												Alternative approach to obtain Be for diatomics via fitting of several Bv
		60	Harmonic OH stretching downshift from AA to AAOO dimer	7	9.5	cm-1	20.3827	22.6439	18.1389	1.98445	2.71171	1.37479	S1: AAOO	2.02365	0.946559	0.467749	0.980629	1.34001	0.679363	S1: AAOO				Structure	References	Quantity	Experimental value / MHz	Upper bound / MHz	Lower bound / MHz	Average	Error interval	Be / cm-1	DBe / cm-1	Be / MHz	DBe / MHz
		61	Harmonic OH stretching downshift from tHP to tHPOO dimer	9	8.5	cm-1	23.5586	23.3533	19.7387	2.9336	2.85145	1.59612	S1: tHPOO	2.46039	1.0601	0.430868	1.19233	1.15894	0.648726	S1: tHPOO				NN monomer	Lofthus and Krupenie; 1977; DOI:10.1063/1.555546	B	59646.5	60839.4	59646.5	60242.9	596.465	1.99824	1.8e-05	59905.8	0.539626
		62	Harmonic HF stretching downshift from HF to HFHF dimer acceptor	32.4229	18.2115	cm-1	43.1572	44.9988	44.8474	0.347423	0.476858	0.465445	S1: HFHF	0.429909	0.101346	0.235738	0.808132	1.10921	1.08266	S1: HFHF				OO monomer	Irikura; 2007; DOI:10.1063/1.2436891	B	43100.4	43962.5	43100.4	43531.4	431.004	1.44562	9e-05	43338.6	2.69813
		63	Harmonic HF stretching downshift from HF to HFHF dimer donor	93.4229	48.7115	cm-1	163.729	175.237	133.264	2.08319	2.82094	0.668964	S1: HFHF	1.8577	1.54653	0.8325	1.12138	1.51851	0.360104	S1: HFHF				HF monomer	Guelachvili; 1976; DOI:10.1016/0030-4018(76)90408-9	B	616366	628693	616366	622529	6163.66	20.9537	2e-06	628176	0.0599585
		64	Harmonic DF stretching downshift from DF to dHFHF dimer acceptor	24.775	14.3875	cm-1	33.4918	34.7862	35.0745	0.367065	0.484174	0.512462	S1: dHFHF	0.454567	0.109018	0.239828	0.807505	1.06513	1.12736	S1: dHFHF				dHF monomer	Talley et al.; 1950; DOI:10.1103/PhysRev.77.529; Ram et al.; 1996; DOI:10.1086/192277; Cazzoni and Puzzarini; 2005; DOI:10.1016/j.jms.2005.01.001	B	325585	332097	325585	328841	3255.85	11.0085	5.4e-07	330027	0.0161888
		65	Harmonic DF stretching downshift from DF to HFdHF dimer donor	68.7923	36.3962	cm-1	116.741	124.89	94.8121	1.73555	2.37567	0.51109	S1: HFdHF	1.54077	1.33987	0.869609	1.12642	1.54187	0.33171	S1: HFdHF				FA monomer	Lerner et al; 1957; DOI:10.1063/1.1743367	A	76800	78336	76800	77568	768
		66	Harmonic OH stretching downshift from gTE to gTEgTE dimer acceptor	23.7	14.85	cm-1	26.2306	26.1537	34.6256	0.0290398	0.0273017	0.5413	S1: gTEgTE	0.199214	0.41897	2.10312	0.145772	0.137047	2.71718	S1: gTEgTE						B	12055.1	12296.2	12055.1	12175.7	120.551
		67	Harmonic OH stretching downshift from gTE to gTEgTE dimer donor	102.7	54.35	cm-1	144.462	163.394	103.056	0.590412	1.24707	4.29284e-05	S1: gTEgTE	0.612508	0.882197	1.4403	0.963925	2.03601	7.00862e-05	S1: gTEgTE						C	10416	10624.3	10416	10520.2	104.16
		68	Harmonic OH stretching downshift from tHP to tHPtHP dimer acceptor	6	7	cm-1	1.1209	3.0531	10.162	0.485829	0.177229	0.353515	S1: tHPtHP	0.338858	0.21895	0.646142	1.43373	0.523019	1.04326	S1: tHPtHP				AA monomer	van Eijck et al., 1981; DOI:10.1016/0022-2852(81)90294-0	A	11335.5	11562.2	11335.5	11448.8	113.355
		69	Harmonic OH stretching downshift from tHP to tHPtHP dimer donor	131	69.5	cm-1	164.449	173.408	141.101	0.231637	0.372321	0.0211248	S1: tHPtHP	0.208361	0.249964	1.19967	1.11171	1.78691	0.101386	S1: tHPtHP						B	9478.6	9668.18	9478.6	9573.39	94.786
		70	Harmonic wavenumber splitting between tHP and gHP monomers	44	8.4	cm-1	37.7423	38.3702	42.4674	0.554972	0.449187	0.0332889	S2: tHP gHP	0.345816	0.390006	1.12779	1.60482	1.29892	0.0962618	S2: tHP gHP						C	5324.9	5431.4	5324.9	5378.15	53.249
		71	Harmonic wavenumber splitting between tHPtHPNN trimer acceptor OH vibrations	20	8.4	cm-1	21.0061	19.0025	26.5631	0.0143458	0.0141016	0.610463	S2: tHPtHPNN	0.21297	0.486828	2.2859	0.0673604	0.0662138	2.86643	S2: tHPtHPNN				gTE monomer	Xu et al.; 1995; DOI:10.1063/1.469968	A	5319.9	5426.3	5319.9	5373.1	53.199
		72	Harmonic wavenumber splitting between tHPtHPNN donor OH vibrations	10	6.4	cm-1	16.7176	18.9746	14.8196	1.10171	1.96639	0.567103	S2: tHPtHPNN	1.21174	0.998581	0.824091	0.909202	1.62279	0.468009	S2: tHPtHPNN						B	2828.5	2885.07	2828.5	2856.78	28.285
		73	Harmonic wavenumber splitting between gHPgHPgHP trimer high frequency OH vibrations	38	22.1	cm-1	30.7352	31.3563	52.9266	0.108059	0.0903723	0.456181	S2: gHPgHPgHP	0.218204	0.291729	1.33695	0.495222	0.414164	2.09061	S2: gHPgHPgHP						C	2796.3	2852.23	2796.3	2824.26	27.963
		74	Harmonic wavenumber splitting between gHPgHPgHP trimer low frequency OH vibrations	52	26.6	cm-1	57.7433	61.8783	53.0666	0.0466187	0.137912	0.00160783	S2: gHPgHPgHP	0.0620461	0.098216	1.58295	0.751356	2.22273	0.0259135	S2: gHPgHPgHP				tHP monomer	Shahi and Arunan; 2015; DOI: 10.1021/acs.jpca.5b03240	A	2105.12	2147.22	2105.12	2126.17	21.0512
		75	Absolute dissociation energy of the HFNN dimer	4.64198	0.381075	kJ mol-1	5.86011	5.71308	4.16666	10.2181	7.90032	1.55573	E1: HFNN	6.55805	6.34199	0.967054	1.5581	1.20468	0.237225	E1: HFNN						B	1054	1075.07	1054	1064.53	10.54
		76	Absolute dissociation energy of the HFHF dimer	12.3867	0.964826	kJ mol-1	13.5948	13.5239	13.6001	1.56784	1.38925	1.5815	E1: HFHF	1.51286	0.151708	0.100279	1.03634	0.918289	1.04537	E1: HFHF						C	932.34	950.986	932.34	941.663	9.3234
		77	Absolute dissociation energy of the dHFHF dimer	13.495	1.06208	kJ mol-1	15.0021	14.9233	14.9627	2.01365	1.80867	1.90979	E1: dHFHF	1.9107	0.144943	0.0758586	1.05388	0.946601	0.99952	E1: dHFHF
		78	Absolute dissociation energy of the HFdHF dimer	12.6204	0.9948	kJ mol-1	14.0044	13.9335	13.9624	1.93554	1.74234	1.81983	E1: HFdHF	1.83257	0.137501	0.0750315	1.05619	0.950764	0.993046	E1: HFdHF
		79	Absolute dissociation energy of the FAFA dimer	58.0125	4.9625	kJ mol-1	66.1888	50.932	64.0648	2.71463	2.03575	1.48742	E1: FAFA	2.07927	0.869405	0.418131	1.30557	0.97907	0.715358	E1: FAFA				Complex rotational constants	Global modifier upper bound	1.04	Global modifier lower bound	0.98
		80	Absolute dissociation energy of the AAAA dimer	66.3	15.1	kJ mol-1	70.6863	55.3586	67.7221	0.0843793	0.525038	0.00886938	E1: AAAA	0.206096	0.394256	1.91297	0.409418	2.54755	0.0430352	E1: AAAA
		81	Difference between absolute dissociation energies of dHFHF and HFdHF dimers	0.87127	0.0730018	kJ mol-1	0.997689	0.989812	1.00031	2.99888	2.63684	3.12474	E2: dHFHF HFdHF	2.92015	0.358221	0.122672	1.02696	0.902979	1.07006	E2: dHFHF HFdHF				Structure	References	Quantity	Experimental value / MHz	Upper bound / MHz	Lower bound / MHz	Average	Error interval
		82	Harmonically zero-point-corrected energy difference between tHPtHPNN conformers	0.3	0.8	kJ mol-1	0.178534	0.598613	1.1841	0.0230532	0.139328	1.2213	E2: tHPtHPNN	0.461227	0.934519	2.02616	0.0499823	0.302081	2.64794	E2: tHPtHPNN				HFNN dimer	Soper et al.; 1982; DOI:10.1063/1.442778	B	3195.35	3323.17	3131.45	3227.31	95.8606
																								tHPNN dimer	Oswald et al.; 2019; in preparation	A	968.1	1006.82	948.738	977.781	29.043
			Average d2(x) for all observables (without diatomics)							1.25452	1.48005	1.03255		1.25571	1.21611	1.24235	1.00515	1.05121	0.943637							B	734.321	763.694	719.635	741.664	22.0296
			Average d2(x) for all observables (with diatomics)							622019	25706.9	59789.6		235838	495229	1.25095	1.03493	1.00191	0.963163							C	533.268	554.598	522.602	538.6	15.998
			Average d2(x) for all vibrations (without diatomics)							1.10659	2.22254	1.24701		1.52538	1.53264	1.08343	0.711526	1.30727	0.981201					HFHF dimer	Lafferty et al.; 1987; DOI10.1016/0022-2852(87)90290-6	B	6246.37	6496.23	6121.45	6308.84	187.391
			Average d2(x) for vibrations (diatomic monomers)							3695.71	8252.74	15898.6		9282.36	9505.68	1.05836	1.05363	0.585646	1.36073					dHFHF dimer	Dyke et al.; 1972; DOI:10.1063/1.1677553	B	6495	6754.8	6365.1	6559.95	194.85
			Average d2(x) for vibrations (polyatomic monomers)							0.11992	2.13633	3.15684		1.80436	2.2646	1.26118	0.0673149	1.15386	1.77883					HFdHF dimer	Lafferty et al.; 1987; DOI10.1016/0022-2852(87)90290-6	B	6500.36	6760.38	6370.36	6565.37	195.011
			Average d2(x) for vibrations (downshifts)							1.73093	2.75538	0.729225		1.73851	1.54877	0.907853	0.960887	1.42407	0.615047					FAFA dimer (with Coriolis coupling)	Zhang et al.; 2017; DOI:10.1063/1.4989863	A	6040.67	6282.29	5919.85	6101.07	181.22
			Average d2(x) for vibrations (isomer splittings)							0.365142	0.531593	0.333729		0.410155	0.453072	1.43154	0.765592	1.12496	1.10944							B	2312.07	2404.55	2265.83	2335.19	69.362
																										C	1661.32	1727.77	1628.09	1677.93	49.8395
			Average d2(x) for all rotational constants (without diatomics)							0.998801	0.712558	0.747227		0.819529	0.935357	1.47605	1.2433	0.838731	0.917966					FAFA dimer (without Coriolis coupling)	Goroya et al.; 2014; DOI:10.1063/1.4872367	A	6067.09	6309.77	5945.75	6127.76	182.013
			Average d2(x) for rotational constants (diatomic monomers)							1.27477e+07	518711	1.20977e+06		4.82538e+06	1.01427e+07	1.60253	1.5671	0.506062	0.926836							B	2288.89	2380.45	2243.11	2311.78	68.6667
			Average d2(x) for rotational constants (polyatomic monomers)							2.00128	0.442166	0.138604		0.860682	1.50777	1.5982	2.19609	0.468469	0.335438							C	1662.5	1729	1629.25	1679.13	49.8751
			Average d2(x) for rotational constants (polyatomic complexes)							0.606884	0.863444	1.03492		0.835082	0.724784	1.42553	0.795896	1.0202	1.1839					gTEgTE dimer	Thomas and Xu; 2014; DOI:10.1021/jz500718f	A	1623.64	1688.58	1591.17	1639.87	48.7091
																										B	415.571	432.194	407.26	419.727	12.4671
			Average d2(x) for all energies							2.69451	2.27219	1.58865		2.18512	1.16657	0.71227	0.937055	1.094	0.968944							C	397.875	413.79	389.918	401.854	11.9363
			Average d2(x) for all dissciation energies							3.08902	2.5669	1.39386		2.34993	1.33997	0.591555	1.06992	1.25782	0.672259					tHPtHP dimer	Oswald et al.; 2019; DOI:10.1002/anie.201813881	A	484.699	504.087	475.005	489.546	14.541
			Average d2(x) for all relative energies							1.51097	1.38808	2.17302		1.69069	0.64637	1.07442	0.538472	0.60253	1.859							B	206.661	214.928	202.528	208.728	6.19984
																										C	170.596	177.42	167.184	172.302	5.11787
																								gHPtHP dimer	Oswald et al.; 2019; DOI:10.1002/anie.201813881	A	581.736	605.005	570.101	587.553	17.4521
		#	Benchmarking observable	Experimental value (anharmonic)	Error	Unit	B3LYP-D3	PBE0-D3	M06-2X	B3LYP-D3	PBE0-D3	M06-2X	Benchmarking observable	Average d2(x) for all three methods	Standard deviation s of d2(x)	Ratio of standard deviation and average of d2(x)	B3LYP-D3	PBE0-D3	M06-2X	Benchmarking observable						B	154.269	160.44	151.184	155.812	4.62808
		1	Equilibrium rotational constant of the NN monomer	59646.5	1	MHz	60750.5	60896.8	61284.1	1.21893e+06	1.56321e+06	2.68182e+06	R1D: NN	1.82132e+06	1.08164e+06	0.593877	0.669258	0.858285	1.47246	R1D: NN						C	152.797	158.909	149.741	154.325	4.5839
		2	Equilibrium rotational constant of the OO monomer	43100.4	1	MHz	43609.7	44461.2	44782.2	259358	1.85166e+06	2.82823e+06	R1D: OO	1.64642e+06	1.83378e+06	1.1138	0.157529	1.12466	1.71781	R1D: OO				gHPgHPgHP trimer	Oswald et al.; 2019; DOI:10.1002/anie.201813881	A	137.952	143.471	135.193	139.332	4.13857
		3	Equilibrium rotational constant of the HF monomer	616366	1	MHz	621534	627205	626575	2.67123e+07	1.17491e+08	1.0424e+08	R1D: HF	8.28144e+07	6.93466e+07	0.837374	0.322556	1.41872	1.25872	R1D: HF						B	128.828	133.981	126.252	130.116	3.86484
		4	Equilibrium rotational constant of the dHF monomer	325585	1	MHz	326649	329629	329298	1.13199e+06	1.63565e+07	1.379e+07	R1D: dHF	1.04262e+07	1.15267e+07	1.10556	0.108573	1.56879	1.32263	R1D: dHF						C	79.0071	82.1674	77.427	79.7972	2.37021
		5	NN monomer harmonic NN stretching band centre	2329.91	1.00006	cm-1	2448.5	2480.37	2525.22	14060.3	22635.9	38139.2	V1D: NN	24945.1	17259.6	0.691903	0.56365	0.907428	1.52892	V1D: NN
		6	OO monomer harmonic OO stretching band centre	1579.91	1	cm-1	1634.88	1712.68	1763.48	3021.74	17628.2	33697.9	V1D: OO	18115.9	21699.5	1.19782	0.1668	0.973076	1.86012	V1D: OO
		7	HF monomer harmonic HF stretching band centre	3961.42	1.00025	cm-1	4084.67	4155.04	4173.98	15181.5	37467.1	45156.2	V1D: HF	32601.6	22017.1	0.675337	0.465667	1.14924	1.38509	V1D: HF
		8	dHF monomer harmonic DF stretching band centre	2906.84	1.09	cm-1	2961.18	3012.19	3025.92	2485.35	9342.16	11936	V1D: dHF	7921.17	6905.51	0.871779	0.313761	1.17939	1.50685	V1D: dHF				Harmonic complexation shifts	Global modifier anharmonic correction	0.5
		9	Equilibrium rotational A constant of the FA monomer	76800	1	MHz	78201.6	78513.6	78197.3	1.96442e+06	2.93636e+06	1.95249e+06	R1P: FA	2.28442e+06	798497	0.34954	0.859921	1.28538	0.854697	R1P: FA
		10	Equilibrium rotational B constant of the FA monomer	12055.1	1	MHz	12084.7	12206.5	12232.1	876.776	22909.3	31322.3	R1P: FA	18369.4	22234.6	1.21041	0.0477301	1.24714	1.70513	R1P: FA				Structure		Experimental downshift / cm-1	Error after anharmonicity correction
		11	Equilibrium rotational C constant of the FA monomer	10416	1	MHz	10467.2	10564.1	10577.5	2620.07	21924.4	26078.5	R1P: FA	16874.3	17703.2	1.04912	0.155269	1.29928	1.54546	R1P: FA				HFNN dimer	Value	43.1795	21.5899
		12	Equilibrium rotational A constant of the AA monomer	11335.5	1	MHz	11379	11480.8	11489.5	1896.83	21116.4	23738.1	R1P: AA	15583.8	16865.2	1.08223	0.121718	1.35502	1.52326	R1P: AA					Error	0.0002
		13	Equilibrium rotational B constant of the AA monomer	9478.6	1	MHz	9491.08	9565.01	9540.44	155.61	7465.9	3823.86	R1P: AA	3815.12	5169.16	1.35491	0.0407876	1.95692	1.00229	R1P: AA				References	Lovejoy and Nesbitt; 1987; DOI:10.1063/1.452026
		14	Equilibrium rotational C constant of the AA monomer	5324.9	1	MHz	5344.66	5390.76	5384.68	390.267	4338.08	3574.07	R1P: AA	2767.47	2961.17	1.06999	0.141019	1.56752	1.29146	R1P: AA				FANN dimer	Value	17	12.5
		15	Equilibrium rotational A constant of the gTE monomer	5319.9	1	MHz	5280.36	5343.25	5357.22	1563.75	545.012	1392.81	R1P: gTE	1167.19	771.538	0.661021	1.33976	0.466943	1.1933	R1P: gTE					Error	4
		16	Equilibrium rotational B constant of the gTE monomer	2828.5	1	MHz	2806.27	2840.16	2854.87	494.222	135.919	695.328	R1P: gTE	441.823	400.734	0.907001	1.1186	0.307632	1.57377	R1P: gTE				References	Oswald et al.; 2018; DOI:10.1021/acs.jpca.8b00334
		17	Equilibrium rotational C constant of the gTE monomer	2796.3	1	MHz	2774.08	2806.85	2823.02	493.863	111.372	714.133	R1P: gTE	439.79	431.331	0.980766	1.12295	0.25324	1.62381	R1P: gTE				dFANN dimer	Value	11	9.5
		18	Equilibrium rotational A constant of the tHP monomer	2105.12	1	MHz	2089.82	2115.66	2122.17	233.995	111.029	290.596	R1P: tHP	211.873	129.831	0.612777	1.10441	0.524035	1.37155	R1P: tHP					Error	4
		19	Equilibrium rotational B constant of the tHP monomer	1054	1	MHz	1042.18	1053.08	1062.53	139.666	0.830896	72.7682	R1P: tHP	71.0882	98.1925	1.38128	1.96468	0.0116882	1.02363	R1P: tHP				References	Oswald et al.; 2018; DOI:10.1021/acs.jpca.8b00334
		20	Equilibrium rotational C constant of the tHP monomer	932.34	1	MHz	922.907	932.693	939.878	88.9772	0.124791	56.8273	R1P: tHP	48.6431	63.6227	1.30795	1.82919	0.00256543	1.16825	R1P: tHP				AANN dimer	Value	13	12.5
		21	FA monomer harmonic OH stretching band centre	3570	2	cm-1	3727.18	3781.27	3800.76	6176.29	11158.6	13312.5	V1P: FA	10215.8	5176.49	0.506714	0.604583	1.09229	1.30313	V1P: FA					Error	6
		22	dFA monomer harmonic OD stretching band centre	2631	2	cm-1	2709.92	2749.13	2763.83	1557.21	3488.68	4411.22	V1P: dFA	3152.37	2059.7	0.653381	0.49398	1.10669	1.39933	V1P: dFA				References	Oswald et al.; 2018; DOI:10.1021/acs.jpca.8b00334
		23	AA monomer harmonic OH stretching band centre	3585	4	cm-1	3750.11	3803.33	3818.94	1703.9	2979.16	3420.61	V1P: AA	2701.22	1260.72	0.466721	0.630789	1.10289	1.26632	V1P: AA				dAANN dimer	Value	10	9
		24	dAA monomer harmonic OD stretching band centre	2644	2	cm-1	2727.76	2766.31	2778.16	1753.96	3740.15	4499.65	V1P: dAA	3331.25	2005.04	0.60189	0.526516	1.12275	1.35074	V1P: dAA					Error	4
		25	gTE monomer harmonic OH stretching band centre	3656.7	1	cm-1	3817.79	3872.43	3877.5	25949.9	46539.2	48750.6	V1P: gTE	40413.2	17782.8	0.440024	0.642114	1.15158	1.2063	V1P: gTE				References	Oswald et al.; 2018; DOI:10.1021/acs.jpca.8b00334
		26	tHP monomer harmonic OH stretching band centre	3623	2	cm-1	3788.89	3840.06	3838.88	6880.13	11778.7	11650.9	V1P: tHP	10103.3	3948.55	0.390819	0.680981	1.16583	1.15319	V1P: tHP				tHPNN dimer	Value	18	13
		27	gHP monomer harmonic OH stretching band centre	3667	2	cm-1	3826.64	3878.43	3881.35	6370.87	11175.6	11486.1	V1P: gHP	9677.53	4055.77	0.419091	0.658315	1.1548	1.18688	V1P: gHP					Error	4
		28	Equilibrium rotational B constant of the HFNN dimer	3195.35	1	MHz	3400.1	3418.86	3357.57	41923.2	49956	26314	R2: HFNN	39397.7	17001.2	0.431527	1.0641	1.26799	0.667906	R2: HFNN				References	Oswald et al.; 2019; in preparation
		29	Equilibrium rotational A constant of the tHPNN dimer	968.1	1	MHz	958.225	969.392	972.858	97.5273	1.66815	22.6353	R2: tHPNN	40.6103	71.2681	1.75493	2.40154	0.041077	0.55738	R2: tHPNN				FAOO dimer	Value	10	9
		30	Equilibrium rotational B constant of the tHPNN dimer	734.321	1	MHz	742.954	740.572	758.474	74.5342	39.0698	583.386	R2: tHPNN	232.33	430.685	1.85376	0.320812	0.168165	2.51102	R2: tHPNN					Error	4
		31	Equilibrium rotational C constant of the tHPNN dimer	533.268	1	MHz	535.659	535.366	548.123	5.71875	4.40344	220.694	R2: tHPNN	76.9387	176.066	2.28839	0.0743287	0.0572331	2.86844	R2: tHPNN				References	Oswald; 2019; PhD thesis; http://hdl.handle.net/11858/00-1735-0000-002E-E5E0-3
		32	Equilibrium rotational B constant of the HFHF dimer	6495	1	MHz	6890.43	6957.17	6922.18	156362	213601	182481	R2: HFHF	184148	40525.1	0.220068	0.849112	1.15994	0.990948	R2: HFHF				AAOO dimer	Value	7	9.5
		33	Equilibrium rotational B constant of the dHFHF dimer	6500.36	1	MHz	6869.94	6936.52	6901.01	136591	190232	160516	R2: dHFHF	162446	38003.5	0.233946	0.840837	1.17105	0.988118	R2: dHFHF					Error	6
		34	Equilibrium rotational B constant of the HFdHF dimer	6246.37	1	MHz	6642.75	6708.77	6672.76	157112	213813	181809	R2: HFdHF	184244	40204.1	0.218211	0.852737	1.16048	0.98678	R2: HFdHF				References	Oswald; 2019; PhD thesis; http://hdl.handle.net/11858/00-1735-0000-002E-E5E0-3
		35	Equilibrium rotational A constant of the FAFA dimer (with Coriolis coupling)	6040.67	1	MHz	6071.93	6123.96	6158.95	977.105	6937.18	13989.8	R2: FAFA	7301.35	9212.14	1.2617	0.133825	0.950123	1.91605	R2: FAFA				tHPOO dimer	Value	9	8.5
		36	Equilibrium rotational B constant of the FAFA dimer (with Coriolis coupling)	2312.07	1	MHz	2323.27	2377.93	2330.38	125.532	4338.3	335.495	R2: FAFA	1599.77	3357.28	2.09859	0.0784682	2.71182	0.209714	R2: FAFA					Error	4
		37	Equilibrium rotational C constant of the FAFA dimer (with Coriolis coupling)	1661.32	1	MHz	1680.33	1712.84	1690.68	361.675	2654.53	862.033	R2: FAFA	1292.75	1704.95	1.31886	0.279773	2.0534	0.666823	R2: FAFA				References	Oswald; 2019; PhD thesis; http://hdl.handle.net/11858/00-1735-0000-002E-E5E0-3
		38	Equilibrium rotational A constant of the FAFA dimer (without Coriolis coupling)	6067.09	1	MHz	6071.93	6123.96	6158.95	23.4205	3234.26	8438.1	R2: FAFA	3898.59	6005.45	1.54041	0.00600742	0.829596	2.1644	R2: FAFA				HFHF dimer acceptor vibration	Value	32.4229	18.2115
		39	Equilibrium rotational B constant of the FAFA dimer (without Coriolis coupling)	2288.89	1	MHz	2323.27	2377.93	2330.38	1182.06	7928.61	1721.71	R2: FAFA	3610.79	5301.97	1.46837	0.327368	2.19581	0.476823	R2: FAFA					Error	2
		40	Equilibrium rotational C constant of the FAFA dimer (without Coriolis coupling)	1662.5	1	MHz	1680.33	1712.84	1690.68	317.957	2533.68	793.773	R2: FAFA	1215.14	1649.56	1.35751	0.261663	2.0851	0.653237	R2: FAFA				References	Suhm et al.; 1992; DOI:10.1063/1.463794 ; Hippler et al.; 2007; DOI: 10.1021/jp076894s
		41	Equilibrium rotational A constant of the gTEgTE dimer	1623.64	1	MHz	1610.33	1638.06	1620.12	177.021	207.921	12.3542	R2: gTEgTE	132.432	148.679	1.12268	1.33669	1.57002	0.0932873	R2: gTEgTE				HFHF dimer donor vibration	Value	93.4229	48.7115
		42	Equilibrium rotational B constant of the gTEgTE dimer	415.571	1	MHz	420.259	414.054	445.818	21.9798	2.30109	914.851	R2: gTEgTE	313.044	737.191	2.35491	0.0702131	0.0073507	2.92244	R2: gTEgTE					Error	2
		43	Equilibrium rotational C constant of the gTEgTE dimer	397.875	1	MHz	402.239	396.536	427.202	19.0414	1.79461	860.081	R2: gTEgTE	293.639	693.854	2.36295	0.0648464	0.00611163	2.92904	R2: gTEgTE				References	Suhm et al.; 1992; DOI:10.1063/1.463794 ; Hippler et al.; 2007; DOI: 10.1021/jp076894s
		44	Equilibrium rotational A constant of the tHPtHP dimer	484.699	1	MHz	479.731	485.533	488.392	24.6838	0.695773	13.6365	R2: tHPtHP	13.0054	16.9797	1.30559	1.89797	0.0534989	1.04853	R2: tHPtHP				HFdHF dimer acceptor DF vibration	Value	24.775	14.3875
		45	Equilibrium rotational B constant of the tHPtHP dimer	206.661	1	MHz	206.123	204.546	211.838	0.289657	4.47389	26.796	R2: tHPtHP	10.5198	20.1525	1.91566	0.0275344	0.425281	2.54718	R2: tHPtHP					Error	2
		46	Equilibrium rotational C constant of the tHPtHP dimer	170.596	1	MHz	169.81	168.871	174.45	0.617168	2.97595	14.8544	R2: tHPtHP	6.14917	10.7913	1.75493	0.100366	0.48396	2.41567	R2: tHPtHP				References	Farrell; 1996; DOI:10.1063/1.471677
		47	Equilibrium rotational A constant of the gHPtHP dimer	581.736	1	MHz	570.606	574.575	596.432	123.874	51.2798	215.983	R2: gHPtHP	130.379	116.735	0.895351	0.950106	0.393315	1.65658	R2: gHPtHP				dHFHF dimer donor DF vibration	Value	68.7923	36.3962
		48	Equilibrium rotational B constant of the gHPtHP dimer	154.269	1	MHz	154.749	153.817	161.049	0.229975	0.204288	45.9691	R2: gHPtHP	15.4678	37.3563	2.4151	0.014868	0.0132073	2.97192	R2: gHPtHP					Error	2
		49	Equilibrium rotational C constant of the gHPtHP dimer	152.797	1	MHz	153.261	152.329	157.429	0.215424	0.218766	21.4622	R2: gHPtHP	7.29879	17.3465	2.37663	0.029515	0.0299729	2.94051	R2: gHPtHP				References	Farrell; 1996; DOI:10.1063/1.471677
		50	Equilibrium rotational A constant of the gHPgHPgHP trimer	137.952	1	MHz	138.257	138.964	143.397	0.0925637	1.02322	29.6425	R2: gHPgHPgHP	10.2528	23.7566	2.31709	0.00902817	0.0997994	2.89117	R2: gHPgHPgHP				gTEgTE dimer acceptor OH vibration	Value	23.7	14.85
		51	Equilibrium rotational B constant of the gHPgHPgHP trimer	128.828	1	MHz	127.908	127.477	131.012	0.846119	1.82575	4.77033	R2: gHPgHPgHP	2.48073	2.88846	1.16436	0.341076	0.735973	1.92295	R2: gHPgHPgHP					Error	3
		52	Equilibrium rotational C constant of the gHPgHPgHP trimer	79.0071	1	MHz	79.1387	79.1644	80.2583	0.0173157	0.0247376	1.56555	R2: gHPgHPgHP	0.535867	1.26111	2.3534	0.0323134	0.0461636	2.92152	R2: gHPgHPgHP				References	Scharge et al.; 2007; DOI: 10.1039/b705498j
		53	Harmonic HF stretching downshift from HF to HFNN	43.1795	1	cm-1	92.4551	102.003	66.416	2428.08	3460.23	539.935	S1: HFNN	2142.75	2094.32	0.977399	1.13316	1.61485	0.251982	S1: HFNN				gTEgTE dimer donor OH vibration	Value	102.7	54.35
		54	Harmonic OH stretching downshift from FA to FANN dimer	17	4	cm-1	36.8577	45.7045	27.32	24.6455	51.4968	6.6564	S1: FANN	27.5996	31.9127	1.15627	0.892968	1.86585	0.241178	S1: FANN					Error	3
		55	Harmonic OH stretching downshift from dFA to dFANN dimer	11	4	cm-1	26.5467	32.7998	20.0462	15.1062	29.702	5.11461	S1: dFANN	16.6409	17.4872	1.05085	0.907776	1.78487	0.307351	S1: dFANN				References	Scharge et al.; 2007; DOI: 10.1039/b705498j
		56	Harmonic OH stretching downshift from AA to AANN dimer	13	6	cm-1	31.0237	39.9909	26.5141	9.02372	20.2364	5.07308	S1: AANN	11.4444	11.1244	0.972039	0.788484	1.76823	0.443281	S1: AANN				tHPtHP dimer acceptor OH vibration	Value	6	7
		57	Harmonic OH stretching downshift from dAA to dAANN dimer	10	4	cm-1	22.4593	28.7634	19.2956	9.70213	22.0041	5.40051	S1: dAANN	12.3689	12.1863	0.985239	0.784397	1.77898	0.43662	S1: dAANN					Error	4
		58	Harmonic OH stretching downshift from tHP to tHPNN dimer	18	4	cm-1	35.4394	41.7914	30.6454	19.0083	35.3769	9.99413	S1: tHPNN	21.4598	18.1977	0.847993	0.885764	1.64852	0.465715	S1: tHPNN				References	Oswald and Suhm; 2017; DOI:10.1002/anie.201705301
		59	Harmonic OH stretching downshift from FA to FAOO dimer	10	4	cm-1	24.0344	25.5264	15.8567	12.3103	15.0668	2.14381	S1: FAOO	9.8403	9.62566	0.978187	1.25101	1.53113	0.21786	S1: FAOO				tHPtHP dimer donor OH vibration	Value	131	69.5
		60	Harmonic OH stretching downshift from AA to AAOO dimer	7	6	cm-1	20.3827	22.6439	18.1389	4.97491	6.7981	3.44653	S1: AAOO	5.07318	2.37297	0.467749	0.980629	1.34001	0.679363	S1: AAOO					Error	4
		61	Harmonic OH stretching downshift from tHP to tHPOO dimer	9	4	cm-1	23.5586	23.3533	19.7387	13.2471	12.8761	7.20748	S1: tHPOO	11.1102	4.78703	0.430868	1.19233	1.15894	0.648726	S1: tHPOO				References	Oswald and Suhm; 2017; DOI:10.1002/anie.201705301
		62	Harmonic HF stretching downshift from HF to HFHF dimer acceptor	32.4229	2	cm-1	43.1572	44.9988	44.8474	28.8063	39.5383	38.5921	S1: HFHF	35.6456	8.40303	0.235738	0.808132	1.10921	1.08266	S1: HFHF
		63	Harmonic HF stretching downshift from HF to HFHF dimer donor	93.4229	2	cm-1	163.729	175.237	133.264	1235.75	1673.38	396.83	S1: HFHF	1101.99	917.405	0.8325	1.12138	1.51851	0.360104	S1: HFHF
		64	Harmonic DF stretching downshift from DF to dHFHF dimer acceptor	24.775	2	cm-1	33.4918	34.7862	35.0745	18.9957	25.056	26.5199	S1: dHFHF	23.5239	5.64169	0.239828	0.807505	1.06513	1.12736	S1: dHFHF
		65	Harmonic DF stretching downshift from DF to HFdHF dimer donor	68.7923	2	cm-1	116.741	124.89	94.8121	574.762	786.752	169.257	S1: HFdHF	510.257	443.724	0.869609	1.12642	1.54187	0.33171	S1: HFdHF
		66	Harmonic OH stretching downshift from gTE to gTEgTE dimer acceptor	23.7	3	cm-1	26.2306	26.1537	34.6256	0.711548	0.66896	13.2632	S1: gTEgTE	4.88123	10.2658	2.10312	0.145772	0.137047	2.71718	S1: gTEgTE
		67	Harmonic OH stretching downshift from gTE to gTEgTE dimer donor	102.7	3	cm-1	144.462	163.394	103.056	193.781	409.305	0.0140897	S1: gTEgTE	201.034	289.549	1.4403	0.963925	2.03601	7.00862e-05	S1: gTEgTE				Harmonic isomer splittings	Global modifier anharmonic correction	0.1
		68	Harmonic OH stretching downshift from tHP to tHPtHP dimer acceptor	6	4	cm-1	1.1209	3.0531	10.162	1.48785	0.542764	1.08264	S1: tHPtHP	1.03775	0.670535	0.646142	1.43373	0.523019	1.04326	S1: tHPtHP
		69	Harmonic OH stretching downshift from tHP to tHPtHP dimer donor	131	4	cm-1	164.449	173.408	141.101	69.9289	112.4	6.37739	S1: tHPtHP	62.9022	75.4618	1.19967	1.11171	1.78691	0.101386	S1: tHPtHP				Structures		Experimental splitting / cm-1	Error after anharmonicity correction
		70	Harmonic wavenumber splitting between tHP and gHP monomers	44	4	cm-1	37.7423	38.3702	42.4674	2.44743	1.98092	0.146804	S2: tHP gHP	1.52505	1.71993	1.12779	1.60482	1.29892	0.0962618	S2: tHP gHP				tHP and gHP monomer OH stretching vibrations	Value	44	8.4
		71	Harmonic wavenumber splitting between tHPtHPNN trimer acceptor OH vibrations	20	4	cm-1	21.0061	19.0025	26.5631	0.0632648	0.0621879	2.69214	S2: tHPtHPNN	0.939198	2.14691	2.2859	0.0673604	0.0662138	2.86643	S2: tHPtHPNN					Error	4
		72	Harmonic wavenumber splitting between tHPtHPNN donor OH vibrations	10	4	cm-1	16.7176	18.9746	14.8196	2.82038	5.03397	1.45178	S2: tHPtHPNN	3.10204	2.55637	0.824091	0.909202	1.62279	0.468009	S2: tHPtHPNN				References	Suhm and Kollipost; 2013; DOI:10.1039/C3CP51515J
		73	Harmonic wavenumber splitting between gHPgHPgHP trimer high frequency OH vibrations	38	4	cm-1	30.7352	31.3563	52.9266	3.29858	2.75867	13.9252	S2: gHPgHPgHP	6.66082	8.90521	1.33695	0.495222	0.414164	2.09061	S2: gHPgHPgHP				tHPtHPNN acceptor OH vibrations	Value	20	8.4
		74	Harmonic wavenumber splitting between gHPgHPgHP trimer low frequency OH vibrations	52	4	cm-1	57.7433	61.8783	53.0666	2.06159	6.0988	0.0711022	S2: gHPgHPgHP	2.74383	4.34336	1.58295	0.751356	2.22273	0.0259135	S2: gHPgHPgHP					Error	4
		75	Absolute dissociation energy of the HFNN dimer	4.761	0.024	kJ mol-1	5.86011	5.71308	4.16666	2097.3	1573.72	613.255	E1: HFNN	1428.09	1064.42	0.745349	1.4686	1.10197	0.429424	E1: HFNN				References	Oswald and Suhm; 2017; DOI:10.1002/anie.201705301
		76	Absolute dissociation energy of the HFHF dimer	12.7043	0.012	kJ mol-1	13.5948	13.5239	13.6001	5506.68	4664.84	5571.81	E1: HFHF	5247.78	715.434	0.136331	1.04934	0.888917	1.06175	E1: HFHF				tHPtHPNN donor OH vibrations	Value	10	6.4
		77	Absolute dissociation energy of the dHFHF dimer	13.841	0.024	kJ mol-1	14.0044	13.9335	13.9624	46.355	14.8592	25.5845	E1: dHFHF	28.9329	22.6453	0.782683	1.60215	0.513575	0.884272	E1: dHFHF					Error	4
		78	Absolute dissociation energy of the HFdHF dimer	12.944	0.024	kJ mol-1	15.0021	14.9233	14.9627	7353.72	6801.62	7074.98	E1: HFdHF	7076.77	390.397	0.0551659	1.03913	0.961119	0.999746	E1: HFdHF				References	Oswald and Suhm; 2017; DOI:10.1002/anie.201705301
		79	Absolute dissociation energy of the FAFA dimer	59.5	0.5	kJ mol-1	66.1888	50.932	64.0648	178.96	293.641	83.3481	E1: FAFA	185.316	148.903	0.803508	0.965698	1.58454	0.449762	E1: FAFA				gHPgHPgHP high frequency OH vibrations	Value	38	22.1
		80	Absolute dissociation energy of the AAAA dimer	68	10	kJ mol-1	70.6863	55.3586	67.7221	0.0721602	1.59805	0.000772405	E1: AAAA	0.556993	1.27602	2.29092	0.129553	2.86906	0.00138674	E1: AAAA					Error	4
		81	Difference between absolute dissociation energies of dHFHF and HFdHF dimers	0.89361	0.005981	kJ mol-1	0.997689	0.989812	1.00031	302.816	258.717	318.286	E2: dHFHF HFdHF	293.273	43.7131	0.149053	1.03254	0.882171	1.08529	E2: dHFHF HFdHF				References	Oswald et al.; 2019; DOI:10.1002/anie.201813881
		82	Harmonically zero-point-corrected energy difference between tHPtHPNN conformers	0.3	0.8	kJ mol-1	0.178534	0.598613	1.1841	0.0230532	0.139328	1.2213	E2: tHPtHPNN	0.461227	0.934519	2.02616	0.0499823	0.302081	2.64794	E2: tHPtHPNN				gHPgHPgHP low frequency OH vibrations	Value	52	26.6
																									Error	4
			Average d2(x) for all observables (without diatomics)							34316.9	51645.3	36986.1		40982.8	14506	1.12717	0.729033	1.03822	1.23275					References	Oswald et al.; 2019; DOI:10.1002/anie.201813881
			Average d2(x) for all observables (with diatomics)							388985	1.72159e+06	1.54154e+06		1.21737e+06	1.03573e+06	1.10364	0.691662	1.04887	1.25947
			Average d2(x) for all vibrations (without diatomics)							1898.73	3364.74	3406.44		2889.97	1388.34	0.89896	0.84139	1.30106	0.857549					Harmonic D0	Global modifier upper limit	1.05	Global modifier lower limit	0.9
			Average d2(x) for vibrations (diatomic monomers)							8687.23	21768.3	32232.3		20896	16970.4	0.859209	0.377469	1.05228	1.57025
			Average d2(x) for vibrations (polyatomic monomers)							7198.89	12980	13933.1		11370.7	5184.15	0.496949	0.605325	1.12812	1.26656					Structures		Experimental value / kJ mol-1	Upper limit / kJ mol-1	Lower limit / kJ mol-1	Average	Error
			Average d2(x) for vibrations (downshifts)							274.137	394.202	72.7593		247.033	232.537	0.907853	0.960887	1.42407	0.615047					HFNN	Value	4.761	4.99905	4.2849	4.64198	0.381075
			Average d2(x) for vibrations (isomer splittings)							2.13825	3.18691	3.65741		2.99419	3.93435	1.43154	0.765592	1.12496	1.10944						Error	0.024
																									References	Bemish; 1994; DOI:10.1063/1.467977
			Average d2(x) for all rotational constants (without diatomics)							71573	107693	75953.4		85073.3	29983.6	1.3517	0.570561	0.835819	1.59362					HFHF dimer	Value	12.7043	13.3396	11.4339	12.3867	0.964826
			Average d2(x) for rotational constants (diatomic monomers)							7.33064e+06	3.43155e+07	3.08851e+07		2.41771e+07	2.09472e+07	0.912653	0.314479	1.24261	1.44291						Error	0.012
			Average d2(x) for rotational constants (polyatomic monomers)							164448	251251	170354		195351	72110.5	0.99725	0.820503	0.856447	1.32305						References	Bohac et al.; 1992; DOI:10.1063/1.462578
			Average d2(x) for rotational constants (polyatomic complexes)							19820.9	27821.9	23210		23617.6	6618.81	1.5354	0.494604	0.788658	1.71674					dHFHF	Value	13.841	14.533	12.4569	13.495	1.06208
																									Error	0.024
			Average d2(x) for all energies							1935.74	1701.14	1711.06		1782.65	298.466	0.873645	0.917125	1.13793	0.944945						References	Klopper et al.; 1998; DOI:10.1063/1.476470
			Average d2(x) for all dissciation energies							2530.51	2225.05	2228.16		2327.91	390.513	0.802325	1.04241	1.31986	0.637723					HFdHF	Value	12.944	13.5912	11.6496	12.6204	0.9948
			Average d2(x) for all relative energies							151.419	129.428	159.754		146.867	22.3238	1.08761	0.541261	0.592126	1.86661						Error	0.024
																									References	Klopper et al.; 1998; DOI:10.1063/1.476470
																								FAFA dimer	Value	59.5	62.475	53.55	58.0125	4.9625
																									Error	0.5
																									References	Kollipost et al.; 2012; DOI:10.1063/1.4704827
																								AAAA dimer	Value	68	71.4	61.2	66.3	15.1
																									Error	10
																									References	Goubet et al.; 2015; DOI:10.1039/C4CP05684A
																								dHFHF - HFdHF	Value	0.89361	0.938291	0.804249	0.87127	0.0730018
																									Error	0.005981
																									References	Klopper et al.; 1998; DOI:10.1063/1.476470
